# Supplementary material for: Divergent Physiological Functions of Four Atg22-like Proteins in Conidial Germination, Development, and Virulence of the Entomopathogenic Fungus Beauveria bassiana
Source: MDPI journal article supplement (doi:10.3390/jof9020262), 2023-02-15
Supplement: s1 [file s1]

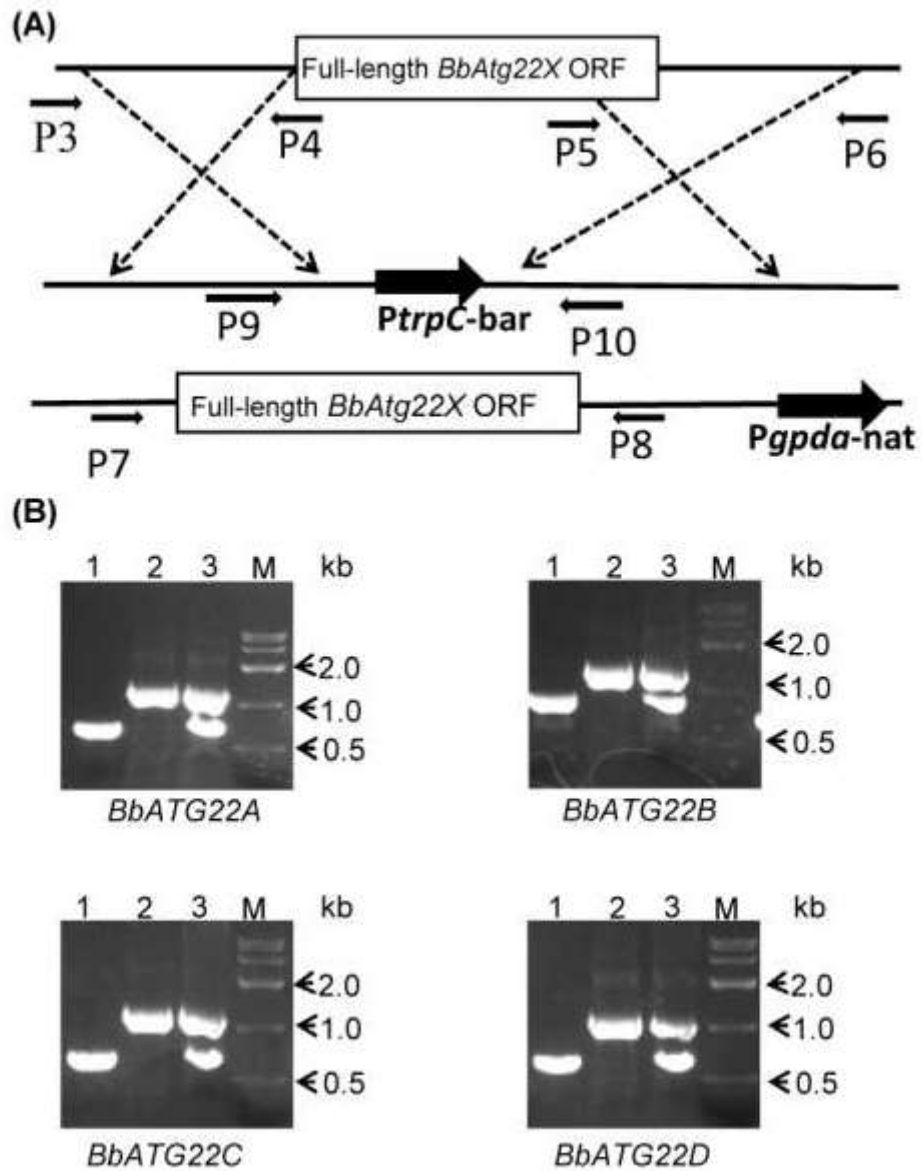

**Figure S1.** Gene disruption and complementation in *B. bassiana*. (A) Schematic diagram of the homologous recombination for gene disruption in fungal genome. The correct gene disruption and complemented mutants were screened by PCR reaction (B). In panel (B), lane 1, 2 and 3 are the wild-type, gene disruption and complementation mutant strains. Lane M: DNA marker. BbATG22X: BbATG22A through D. P1-P10: primer set for gene disruption and complementation of the indicated gene.

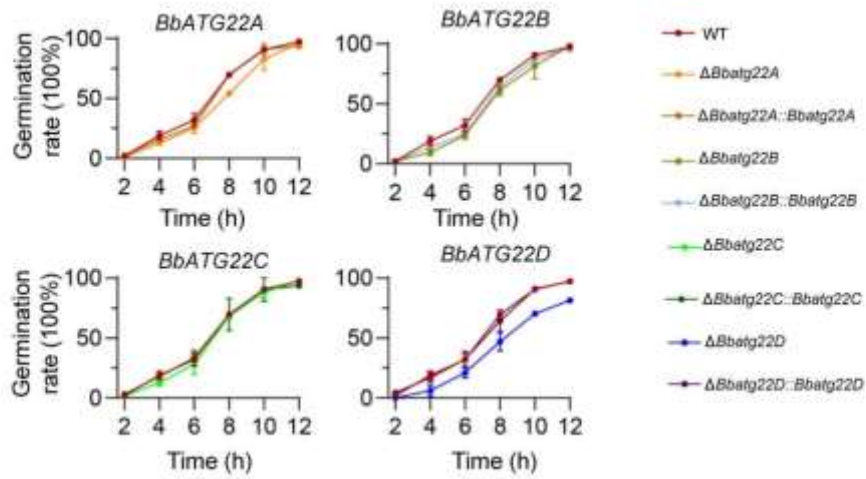

**Figure S2.** Conidial germination of gene disruption mutants. The wild-type (WT), gene disruption and complementation mutant strains were cultured on SDAY plates, and conidia were sampled at 7d. The sampled conidia were inoculated on nutrient-rich plates (SPA) and incubated at 25 °C. Conidial germination was determined every two hours for 12 h and indicated as germination percentage (%).

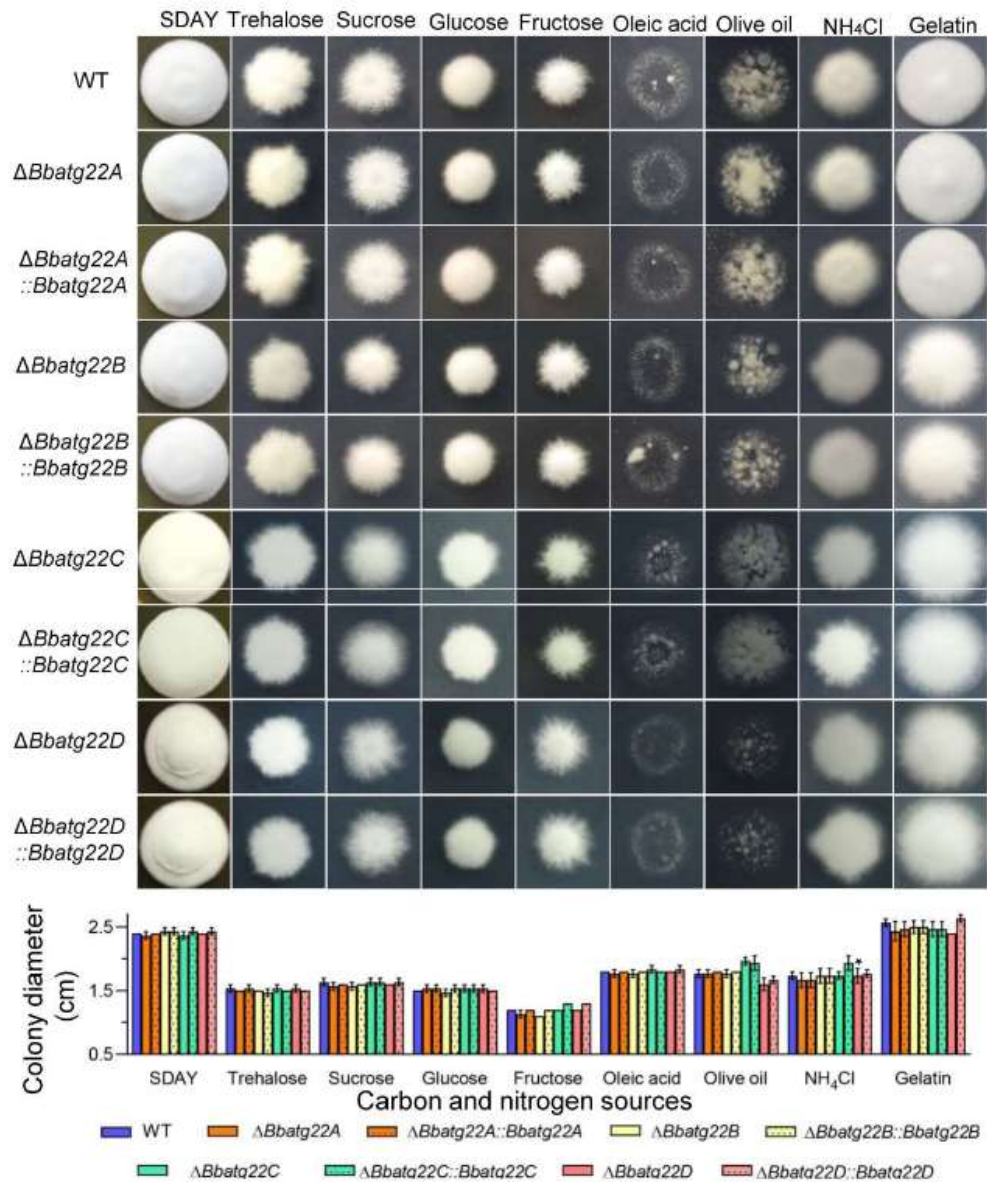

**Figure S3.** Effects of the gene loss on vegetative growth of *B. bassiana*.

On the basis of CZA, sucrose and NaNO<sub>3</sub> were replaced with the indicated carbon and nitrogen sources, including trehalose, sucrose, glucose, fructose, oleic acid, olive oil, NH<sub>4</sub>Cl, and gelatin. SDAY plate was used as the control of nutrient-rich medium. The wild-type (WT), gene disruption and complementation mutant strains were cultured on SDAY plates till conidiation. Conidial suspension was inoculated on the plates. Colony diameter was measured after incubation of 7 d at 25 °C. There was no significant difference in colony diameter between the wild-type and gene disruption mutant strain.

**Table S1.** Primers used in this study.

| Primers                                    | Paired sequences (5'–3')*                                                                                                 | Purpose                                      |
|--------------------------------------------|---------------------------------------------------------------------------------------------------------------------------|----------------------------------------------|
| P <sub>Atg22A1</sub> /P <sub>Atg22A2</sub> | <u>CATTCAATCACAACACCTTCAAAATGCCGCCA</u><br>AACGCGTCTCGCCCCA/ <u>CAGCTCCTCGCCCTTGC</u><br>TCACCATACATCTTGCCGTCTCTTCCGAGTCG | Amplifying <i>Bbatg22A</i><br>cDNA           |
| P <sub>Atg22A3</sub> /P <sub>Atg22A4</sub> | <u>CGAGCTGTACAAGTAACCCGGGGCCAGGGCAGT</u><br>TGTCTTTCT/ <u>TTGGCTGCAGGTCGACGGATCCTTC</u><br>GCGGCCAATGTCTTGTT              | Amplifying 5'-fragment of<br><i>Bbatg22A</i> |

|                                             |                                                                                                                                            |                                                                     |
|---------------------------------------------|--------------------------------------------------------------------------------------------------------------------------------------------|---------------------------------------------------------------------|
| P <sub>Atg22A5</sub> /P <sub>Atg22A6</sub>  | <u>CGACCCATGGCTCGAGTCTAGACGACTTAGGCT</u><br><u>CATTTATCCC/GGTGGTGGTGGCTAGCGTTAACT</u><br>GTATCCGCCACAACCTCTT                               | Amplifying 3'-fragment of<br><i>BbATG22A</i>                        |
| P <sub>Atg22A7</sub> /P <sub>Atg22A8</sub>  | <u>ACAGTACACGAGGACTTCTAGAGCCAGGGCAGT</u><br><u>TGTCTTTCT/GCCCTGCCCCTGAGAGGAATTCTGT</u><br>TACAGCCCTGAGTCAAAGTA                             | Cloning the <i>BbATG22A</i> full<br>ORF for gene<br>complementation |
| P <sub>Atg22A9</sub> /P <sub>Atg22A10</sub> | TACAATACCGTCGGGCTGTTA/GACAAGTCCGAG<br>GACATAGACG                                                                                           | Screening transformants                                             |
| P <sub>Atg22B1</sub> /P <sub>Atg22B2</sub>  | <u>CATTCAATCACAAACACCTTCAAAATGATGGGG</u><br><u>AGCAAGGCTTCTCGAGAT/CAGCTCCTCGCCCTT</u><br><u>GCTCACCATTTGCTGTGATAGTATTCTGAGTCTTC</u><br>T   | Amplifying <i>BbATG22B</i><br>cDNA                                  |
| P <sub>Atg22B3</sub> /P <sub>Atg22B4</sub>  | <u>CGAGCTGTACAAGTAACCCGGGTTTAAAGACT</u><br><u>CGTCAAGAATA/TTGGCTGCAGGTCGACGGATCC</u><br>GAAATGGGCTCAAGTTCGTATC                             | Amplifying 5'-fragment of<br><i>BbAtg22B</i>                        |
| P <sub>Atg22B5</sub> /P <sub>Atg22B6</sub>  | <u>CGACCCATGGCTCGAGTCTAGACCTGATTGCCT</u><br><u>ACCAGCTCACA/GGTGGTGGTGGCTAGCGTTAAC</u><br>CGCATCAACATCCGCACAAT                              | Amplifying 3'-fragment of<br><i>BbATG22B</i>                        |
| P <sub>Atg22B7</sub> /P <sub>Atg22B8</sub>  | <u>ACAGTACACGAGGACTTCTAGATTTAAAGACT</u><br><u>CGTCAAGAATA/GCCCTGCCCCTGAGAGGAATTC</u><br>CGCATCAACATCCGCACAAT                               | Cloning the <i>BbAtg22B</i> full<br>ORF for gene<br>complementation |
| P <sub>Atg22B9</sub> /P <sub>Atg22B10</sub> | TTTCGTGAGCGATGCGTGAT/GACAAGTCCGAGG<br>ACATAGACG                                                                                            | Screening transformants                                             |
| P <sub>Atg22C1</sub> /P <sub>Atg22C2</sub>  | <u>CATTCAATCACAAACACCTTCAAAATGGATTCT</u><br><u>GTCCGGCACCCCGAGGA/CAGCTCCTCGCCCTTG</u><br><u>CTCACCATTTGCCGTCGTTGCAGCATCACTACTG</u>         | Amplifying <i>BbATG22C</i><br>cDNA                                  |
| P <sub>Atg22C3</sub> /P <sub>Atg22C4</sub>  | CGAGCTGTACAAGTAACCCGGGAAAACTGGC<br>GTAGTAACCG/TTGGCTGCAGGTCGACGGATCCG<br>CTCAGCTTTCGCAAATACC                                               | Amplifying 5'-fragment of<br><i>BbATG22C</i>                        |
| P <sub>Atg22C5</sub> /P <sub>Atg22C6</sub>  | CGACCCATGGCTCGAGTCTAGATTGGTGGTAAT<br>GGTGGTGCT/GGTGGTGGTGGCTAGCGTTAACGT<br>TTGAAAGTTCCAAGCCTGTA                                            | Amplifying 3'-fragment of<br><i>BbATG22C</i>                        |
| P <sub>Atg22C7</sub> /P <sub>Atg22C8</sub>  | <u>ACAGTACACGAGGACTTCTAGACGAGAATGACC</u><br><u>GTCTGGAAT/GCCCTGCCCCTGAGAGGAATTCGA</u><br>GGGATGAATACAAGTAACCACA                            | Cloning the <i>BbATG22C</i> full<br>ORF for gene<br>complementation |
| P <sub>Atg22C9</sub> /P <sub>Atg22C10</sub> | GCGGCTTCTTTATGAACATT/GAAACCTGAGAGA<br>GACTTGCTA                                                                                            | Screening transformants                                             |
| P <sub>Atg22D1</sub> /P <sub>Atg22D2</sub>  | <u>CATTCAATCACAAACACCTTCAAAATGAGCTAC</u><br><u>CAAGGGCACGGAAATCGT/CAGCTCCTCGCCCTT</u><br><u>GCTCACCATATTAGCCGATACCAGAGTCTTCTCC</u><br>GCAT | Amplifying <i>BbATG22D</i><br>cDNA                                  |

|                                              |                                                                                                                          |                                                                     |
|----------------------------------------------|--------------------------------------------------------------------------------------------------------------------------|---------------------------------------------------------------------|
| P <sub>Atg22D3</sub> /P <sub>Atg22D4</sub>   | <u>CGAGCTGTACAAGTAACCCGGG</u> ACTGTATTATT<br>AGCGGATGTCG/ <u>TTGGCTGCAGGTCGACGGATCC</u><br>GTAATGATGTAGCGGTTTATGC        | Amplifying 5'-fragment of<br><i>BbATG22D</i>                        |
| P <sub>Atg22D5</sub> /P <sub>Atg22D6</sub>   | <u>CGACCCATGGCTCGAGTCTAGAGCCTCGCCGAC</u><br>TACTCCAAT/ <u>GGTGGTGGTGGCTAGCGTTAACCC</u><br>ATCGTGATGCAGTTCCCT             | Amplifying 3'-fragment of<br><i>BbATG22D</i>                        |
| P <sub>Atg22D7</sub> /P <sub>Atg22D8</sub>   | <u>ACAGTACACGAGGACTTCTAGAGAGGACTGTAT</u><br>TATTAGCGGATGT/ <u>GCCCTGCCCCTGAGAGGAAT</u><br><u>TCTCATTTTCGTTTCACGGTGGG</u> | Cloning the <i>BbAtg22D</i> full<br>ORF for gene<br>complementation |
| P <sub>Atg22D9</sub> /P <sub>Atg22D10</sub>  | GAACTGTGGCTCATTTGAAGAA/AATGCGCCAAA<br>CAGGTAGAT                                                                          | Screening transformants                                             |
| P <sub>Atg22A11</sub> /P <sub>Atg22A12</sub> | TATCCACCACAATCTCCT/CTGTGACCAAGTCGT<br>ATT                                                                                | qRT-PCR for <i>BbAtg22A</i>                                         |
| P <sub>Atg22B11</sub> /P <sub>Atg22B12</sub> | GAAATTGGACCGACAAAT/AATCATAATCTGAG<br>AATAACTGTA                                                                          | qRT-PCR for <i>BbAtg22B</i>                                         |
| P <sub>Atg22C11</sub> /P <sub>Atg22C12</sub> | TGCCTGCTCTATCTTCTC/GCGAATACTTGATGAC<br>CTC                                                                               | qRT-PCR for <i>BbAtg22C</i>                                         |
| P <sub>Atg22D11</sub> /P <sub>Atg22D12</sub> | TCCAAGGTGTCATTCAAA/ATCCACATCTGTCCA<br>TAC                                                                                | qRT-PCR for <i>BbAtg22D</i>                                         |
| 18SF/18SR                                    | TGGTTTCTAGGACCGCCGTAA/CCTTGGCAAATG<br>CTTTCGC                                                                            | Reference in qRT-PCR                                                |

\*: The underlined region is required for homologous recombination during plasmid.
